# Supplementary material for: Transferrin improved the generation of cardiomyocyte from human pluripotent stem cells for myocardial infarction repair
Source: PubMed Central journal article supplement (PMC7790792; doi:10.1007/s10735-020-09926-0), 2020-11-11

**Supplementary Fig. 1 Optimization of transferrin dose for CM differentiation**

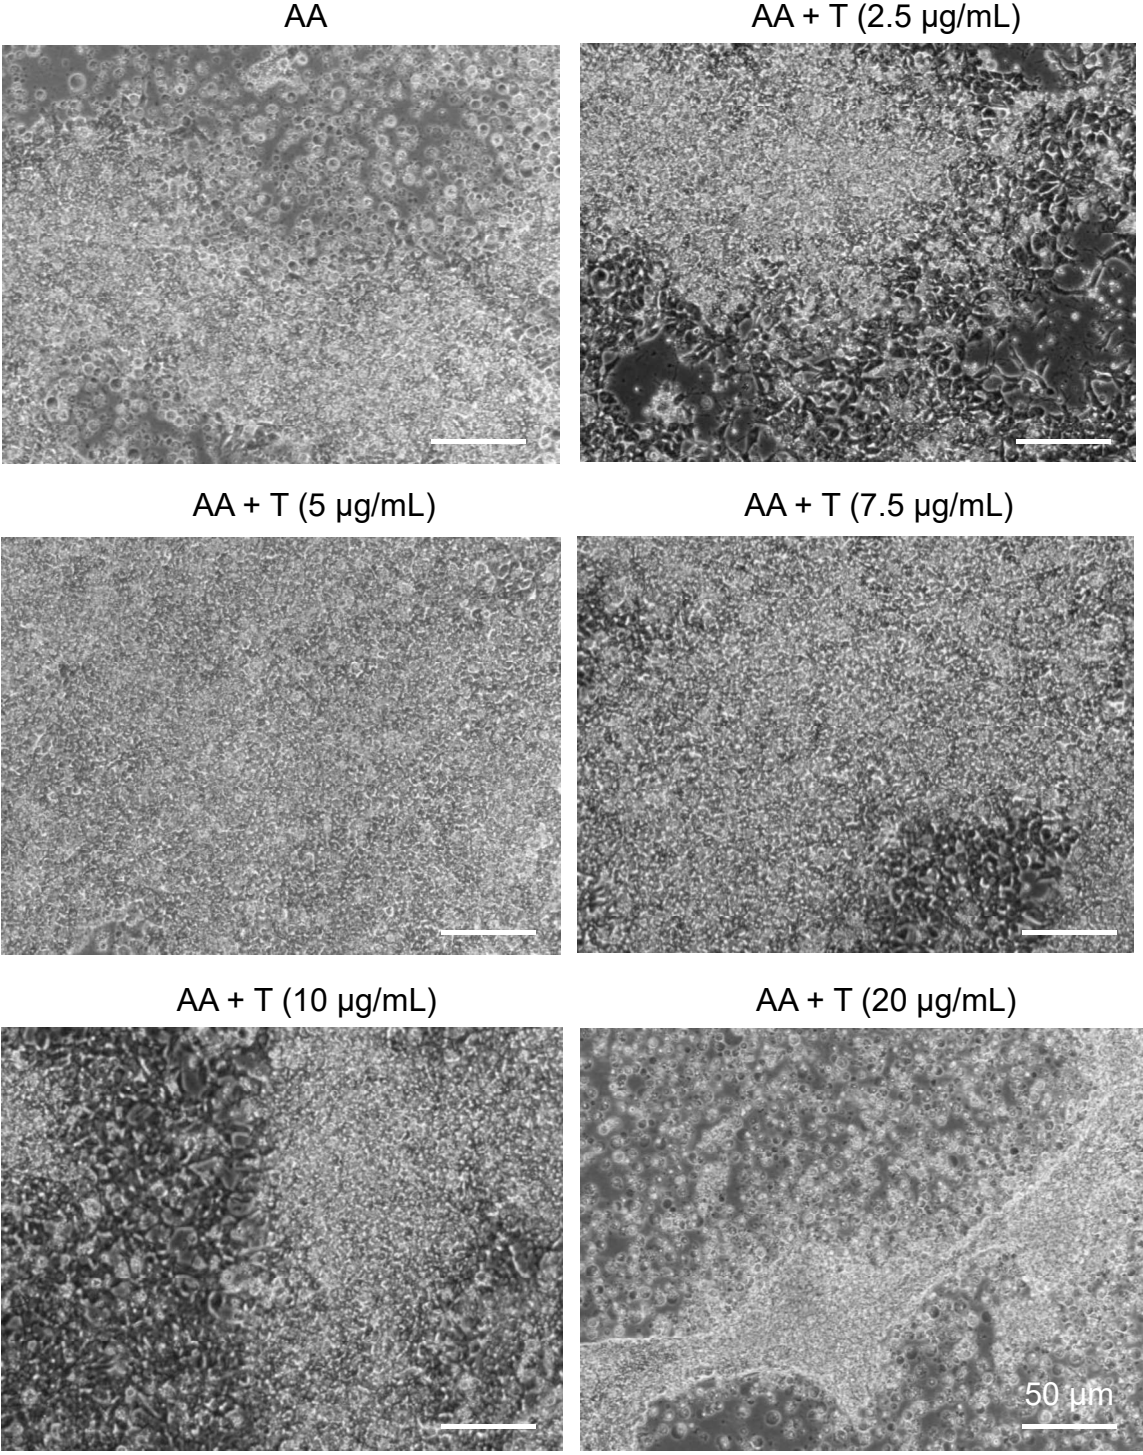

**Supplementary Fig. 2 Simultaneous confocal imaging of Ca<sup>2+</sup> transient in day 21 hiPSC-CMs**

**a.**

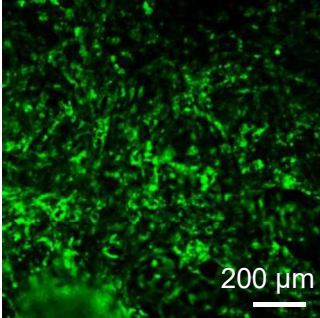

**b.**

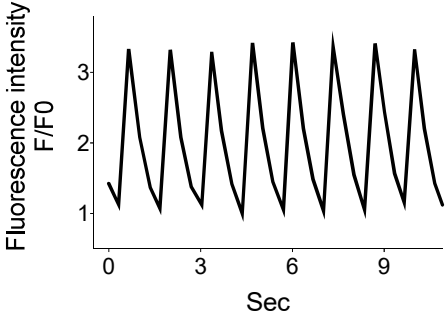

# Supplementary Fig. 3 Assessment of addition of sodium selenite on cardiac differentiation

a.

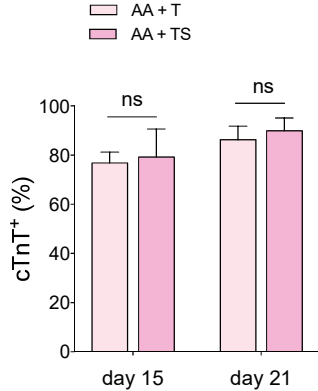

b.

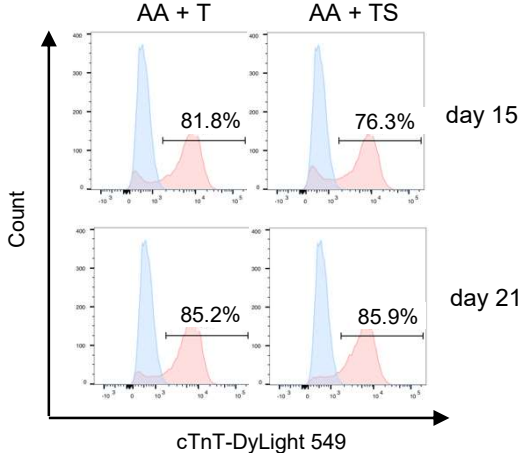

# Supplementary Fig. 4 Q-PCR validation of stage-specific genes during hiPSC-derived cardiac differentiation according to the RNA-seq results

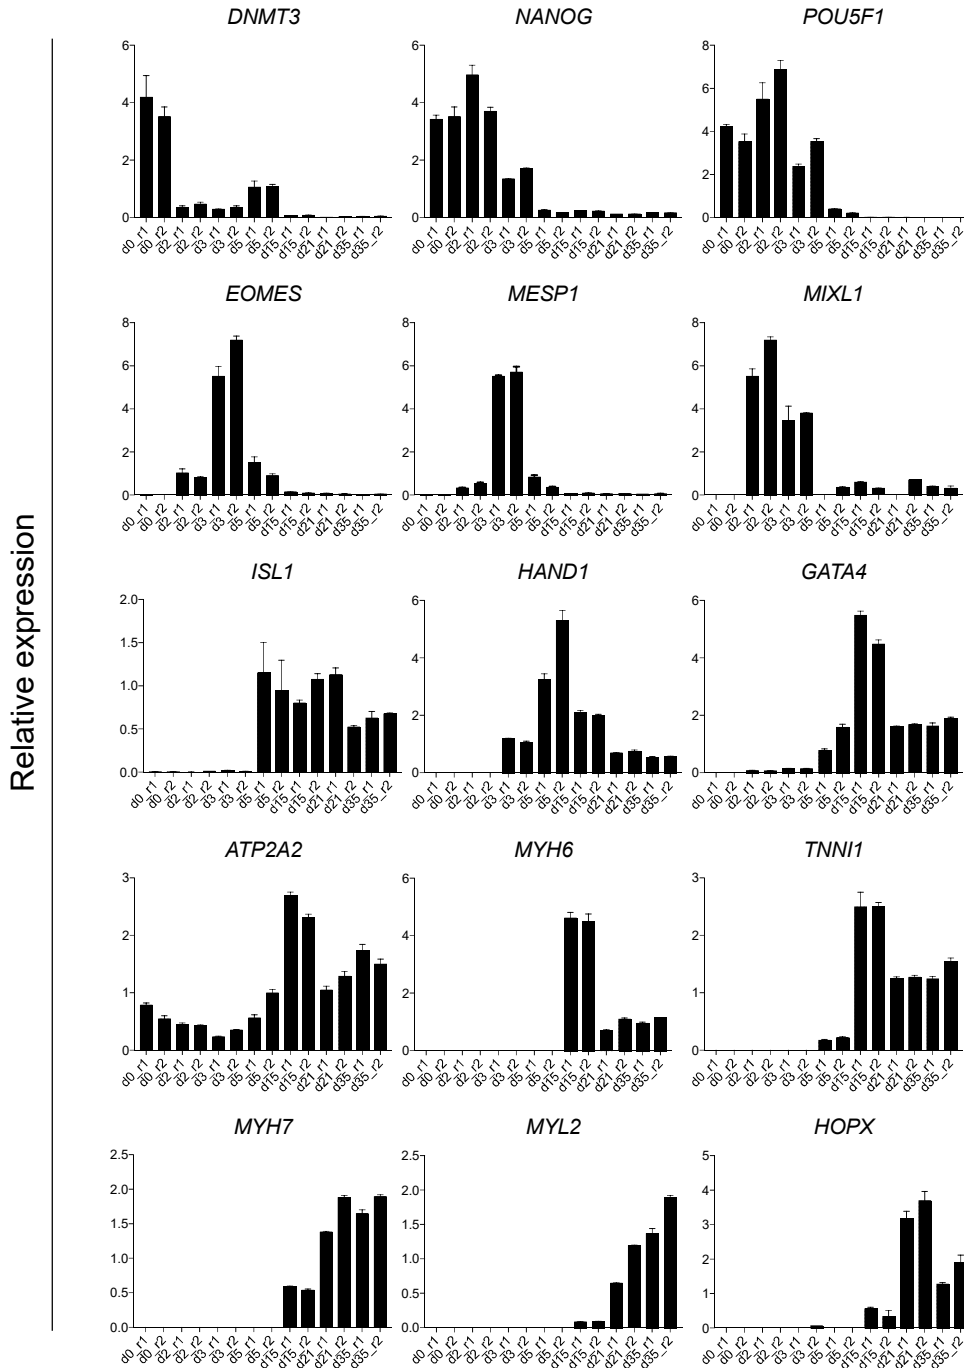

# Supplementary Fig. 5 Quantitative cardiac function analysis of LVFS and LVEF on day 3 post-transplantation

a.

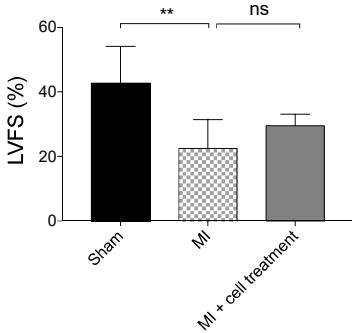

b.

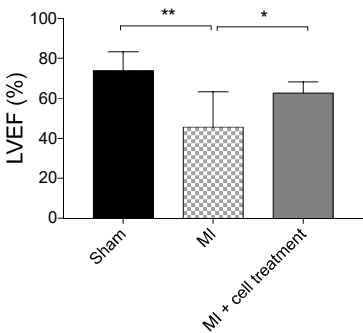

Supplement: 10735_2020_9926_MOESM1_ESM.pdf [file 10735_2020_9926_MOESM1_ESM.pdf]
